# Supplementary material for: Nitrogen metabolic characteristics and adaptive mechanisms of Paracoccus sp. QD-21 under complex nitrogenous environments
Source: Research Square preprint supplement (doi:10.21203/rs.3.rs-8539285/v1), 2026-01-14
Supplement: Supplementary file 1 [file 2eb9d242e480016e8ac6fff6.docx]

**Nitrogen metabolic characteristics and adaptive mechanisms of Paracoccus sp. QD-21 under complex nitrogenous environments**


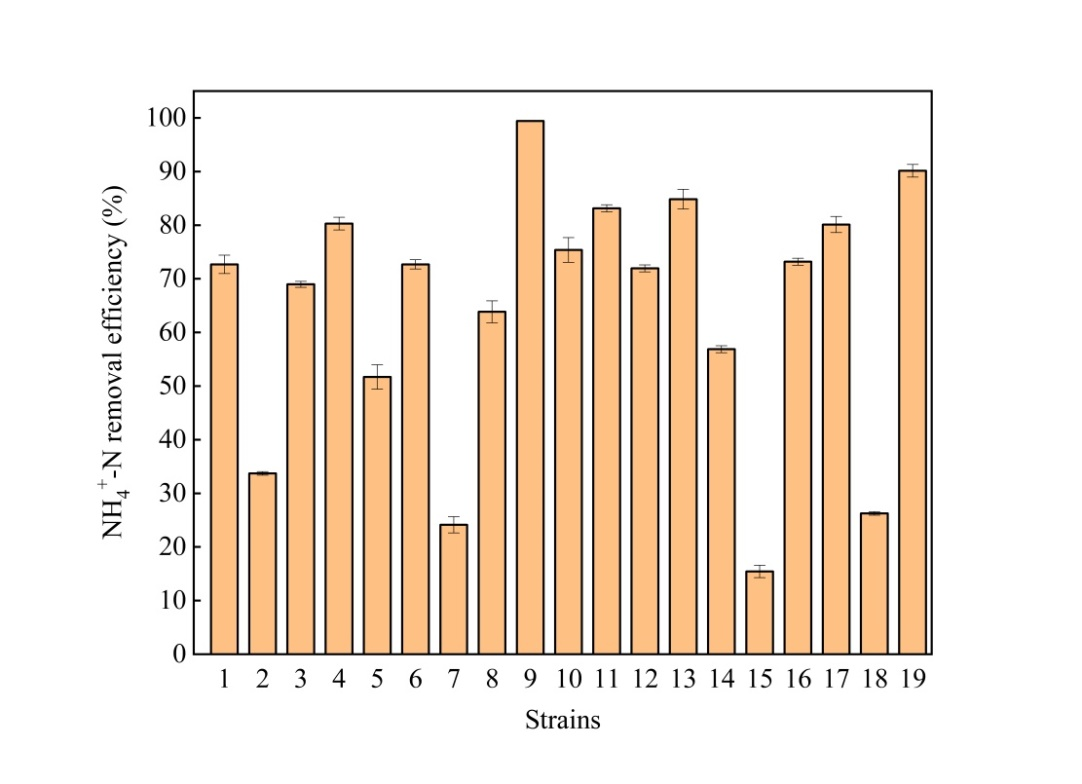


Fig. S1. Nitrogen removal efficiency of strains at first screening.

Table S1 Levels of the variables in response surface methodology

| Factors | Experimental value | | |
| --- | --- | --- | --- |
| −1 | 0 | + 1 |
| pH | 8 | 8.5 | 9 |
| Temperature（℃） | 35 | 37.5 | 40 |
| Inoculation dosage（%） | 4 | 4.5 | 5 |
